# Supplementary material for: Purinergic P2Y12 Receptor Activation in Eosinophils and the Schistosomal Host Response
Source: PubMed Central journal article supplement (PMC4598158; doi:10.1371/journal.pone.0139805), 2015-10-08

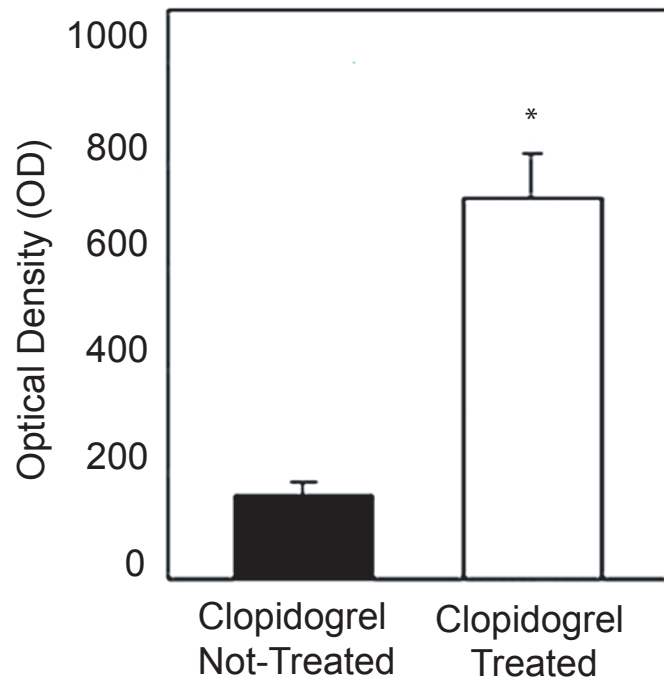

Supplement: pone.0139805.s001.pdf [file pone.0139805.s001.pdf]
